## AERODYNAMIC CHARACTERISTICS OF DRAGONFLY WING SECTIONS COMPARED WITH TECHNICAL AEROFOILS

ANTONIA B. KESEL\*

*Department of Zoology, Technical Biology and Bionics, University of Saarland, D-66041 Saarbrücken, Germany*

\*e-mail: a.kesel@rz.uni-sb.de

*Accepted 18 July; published on WWW 26 September 2000*

### Summary

During gliding, dragonfly wings can be interpreted as acting as ultra-light aerofoils which, for static reasons, have a well-defined cross-sectional corrugation. This corrugation forms profile valleys in which rotating vortices develop. The cross-sectional configuration varies greatly along the longitudinal axis of the wing. This produces different local aerodynamic characteristics. Analyses of the  $C_L/C_D$  characteristics, where  $C_L$  and  $C_D$  are the lift and drag coefficients, respectively (at Reynolds numbers  $Re$  of 7880 and 10 000), using a force balance system, have shown that all cross-sectional geometries have very low drag coefficients ( $C_{D,min} < 0.06$ ) closely resembling those of flat plates. However, the wing profiles, depending upon their position along the span length, attain much higher lift values than flat plates. The orientation of the leading edge does not play an important role. The detectable lift forces

can be compared with those of technical wing profiles for low  $Re$  numbers. Pressure measurements (at  $Re=9300$ ) show that, because of rotating vortices along the chord length, not only is the effective profile form changed, but the pressure relationship on the profile is also changed. Irrespective of the side of the profile, negative pressure is produced in the profile valleys, and net negative pressure on the upper side of the profile is reached only at angles of attack greater than  $0^\circ$ . These results demonstrate the importance of careful geometrical synchronisation as an answer to the static and aerodynamic demands placed upon the ultra-light aerofoils of a dragonfly.

Key words: dragonfly, *Aeshna cyanea*, gliding, wing profile, lift, drag, pressure.

### Introduction

In contrast to other four-winged insects, the fore- and hindwings of dragonflies are not coupled; they function independently. Thanks to this double flight-power system, large dragonflies (Anisoptera) are capable of carrying out incredible flight manoeuvres (Rüppell, 1989; Rüppell and Hilfert, 1993). Even gliding flight, which is seldom found in Pterygota, is part of their repertoire. This energetically and thermoregulatory important flight behaviour (e.g. May, 1995a,b) enables one to treat the wings of these animals as aerofoils.

The aerodynamic characteristics of an aerofoil can be determined using simple steady-state analyses by disregarding unsteady effects. The air surrounding a wing is accelerated to generate the aerodynamic forces lift  $L$  and drag  $D$ , and the resultant force thrust  $T$ , that enable the insect to fly. The aerodynamic performance of the wing can be quantified by the relationship between lift and drag.

Dragonfly wings are not smooth or simple cambered surfaces. The cross-sectional camber of the wing has a well-defined corrugated configuration. This design is of critical importance to the stability of this ultra-light construction (e.g. Hertel, 1963; Rees, 1975a; Wootton, 1991, 1992; Newman and Wootton, 1986; Kesel et al., 1998). However, from an

aerodynamic point of view, this cross section does not appear to be very suitable. The pronounced bends and edges should lead to high drag values. However, in visualising experiments using profile models, Rees (1975b), Newman et al. (1977), Rudolph (1978) and Buckholz (1986) have shown that this geometry induces positive flow conditions. The vortices filling the profile valleys formed by these bends 'smooth down' the profile geometry (Kesel, 1998).

To date, little attention has been paid to variations in the corrugation along the longitudinal axis. The corrugation decreases gradually towards the wing tip, where the wing more or less flattens out. Furthermore, the orientation of the leading edge changes at the nodus. The first bend, formed by the costa, subcosta and radius (Fig. 1) and lying basal from the nodus, faces upwards. This orientation changes because the costa and subcosta fuse at the nodus, distal from which, the first valley is built by the costa, radius and mediana 1, so that the leading edge faces downwards.

Because of the changing corrugation along the longitudinal axis and the changing orientation of the leading edge, one might expect to find differing aerodynamic characteristics along the wing axis. The present study aims to clarify the aerodynamic influence of the 'dynamic smoothing' of the

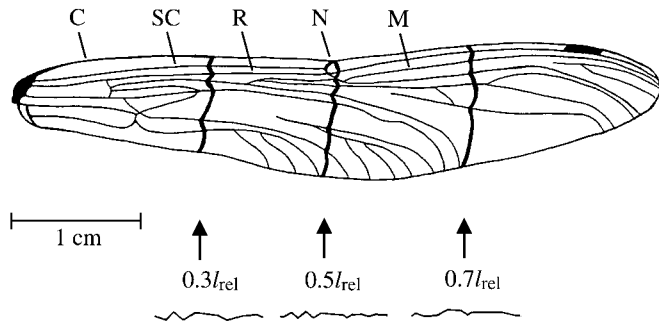

Fig. 1. Drawing of a dragonfly forewing (*Aeshna cyanea*) with profile cross sections shown below at 0.3, 0.5 and 0.7  $l_{rel}$ , where  $l_{rel}$  is the relative span length. C, costa; SC, subcosta; R, radius; N, nodus; M, mediana 1.

profile by the vortices generated in the valleys of the bends. Particular consideration is given to changes in profile geometry along the longitudinal axis of the wing.

## Materials and methods

### The profiles

Geometrical variables for the profiles used are given in Table 1. The following 'technical' profiles were used: a flat plate, a curved plate (camber 7%) and a narrow asymmetric profile (BENEDEK B-6457- $e_{mod}$ ) with a small leading edge (radius  $r=0.6$  mm) and 7% camber. These profiles with elongated tails are used in building model aeroplanes for low  $Re$  ( $<70\,000$ ) (Bender, 1987).

Since it was not possible to make sufficiently good enlargements of dragonflies filmed during gliding flight, the cross-sectional geometry had to be determined from a dried dragonfly forewing (*Aeshna cyanea* Müller). It was obtained using a scanning stereo-optical method: photographs of the

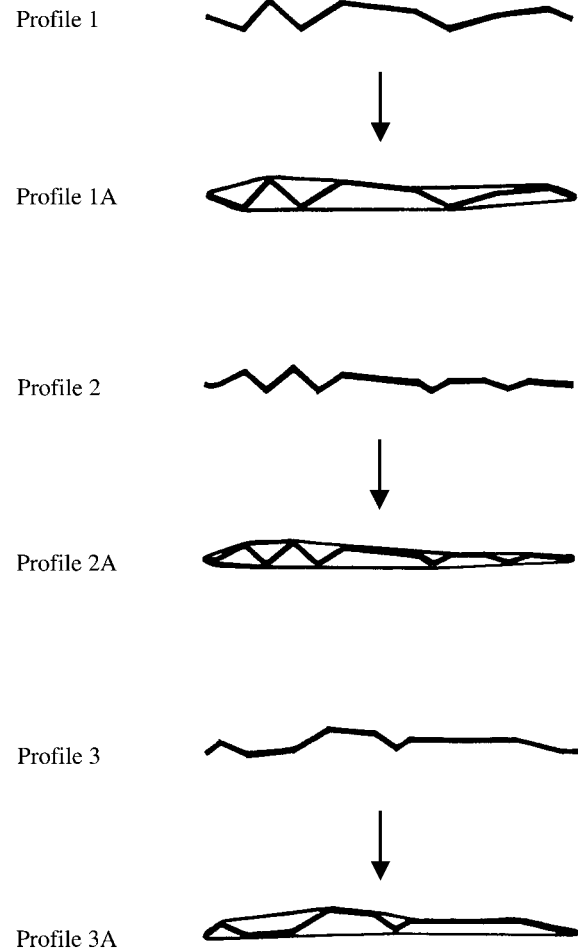

Fig. 2. Geometry of wing profiles used in this study. Profiles 1, 2 and 3 were constructed using measurements taken from the wing cross section at 0.3, 0.5 and 0.7  $l_{rel}$ , respectively, where  $l_{rel}$  is the relative span length. Profiles 1A, 2A and 3A were built by connecting the peaks of the respective cross sections as shown (see Table 1 for model dimensions).

Table 1. Geometrical variables of the profiles used in this study

| Profile            | $c$<br>(mm) | $t$<br>(mm) | $l$<br>(mm) | $S$<br>( $m^2$ ) | $\mathcal{R}$ | $t/c$<br>(%) |
|--------------------|-------------|-------------|-------------|------------------|---------------|--------------|
| Flat plate         | 74.8        | 2.5         | 279         | 0.021            | 3.730         | 3.342        |
| Curved plate       | 74.5        | 2.5         | 279         | 0.021            | 3.745         |              |
| Asymmetric profile | 111.0       | 7.0         | 259         | 0.029            | 2.333         | 6.306        |
| 1                  | 76.3        | 5.6         | 280         | 0.021            | 3.670         | 7.339        |
| 2                  | 81.0        | 6.1         | 281         | 0.023            | 3.469         | 7.531        |
| 3                  | 82.1        | 5.2         | 279         | 0.023            | 3.398         | 6.334        |
| 1A                 | 82.6        | 8.3         | 275         | 0.023            | 3.329         | 10.048       |
| 2A                 | 83.1        | 6.8         | 278         | 0.023            | 3.345         | 8.183        |
| 3A                 | 83.4        | 7.0         | 280         | 0.023            | 3.357         | 8.393        |
| 4                  | 78.3        | 8.9         | 279         | 0.022            | 3.563         | 11.367       |

For the geometry of model wing profiles, see Figs 2 and 3.

$c$ , chord length;  $t$ , profile thickness;  $l$ , span length;  $S$ , profile area;  $\mathcal{R}$ , aspect ratio.

dragonfly wing together with a calibrating cube of known size ( $1\text{ cm}^3$ ) were taken from three positions in space and digitized. Using coordinate transformation software (PICTRAN-D) and the coordinates of the calibrating body, it was possible to reconstruct the three-dimensional geometry of the photographed wing. The topography of the wing were thus determined almost non-invasively. These measurements were used to produce enlarged ( $\times 7.5$ ) profile models.

Wing profile geometry varies with position along the span. Cross sections were taken at relative span lengths  $l_{rel}$  of 0.3 (profile 1; where  $l_{rel}=0.3=30\%$  of span length starting at the wing base), 0.5 (profile 2 near the nodal area, see Fig. 1) and 0.7 (profile 3) (Fig. 2). The models were made of 0.25 mm thick sheet brass. Filled profiles (profiles 1A, 2A and 3A), based on the cross-sectional geometry of wing profiles 1–3 but with the 'valleys' filled (Fig. 2), were made from lacquered balsa wood.

A final profile, the pressure profile (profile 4), used in the

Fig. 3. Geometry of profile 4 with the 12 pipes, each with five holes on the upper and lower surfaces of the profile. The pipes represent the 12 positions at which pressure was measured along the chord length shown. The upper part of the figure shows the region of the profile from which profile 4 was derived (see Table 1 for model dimensions).

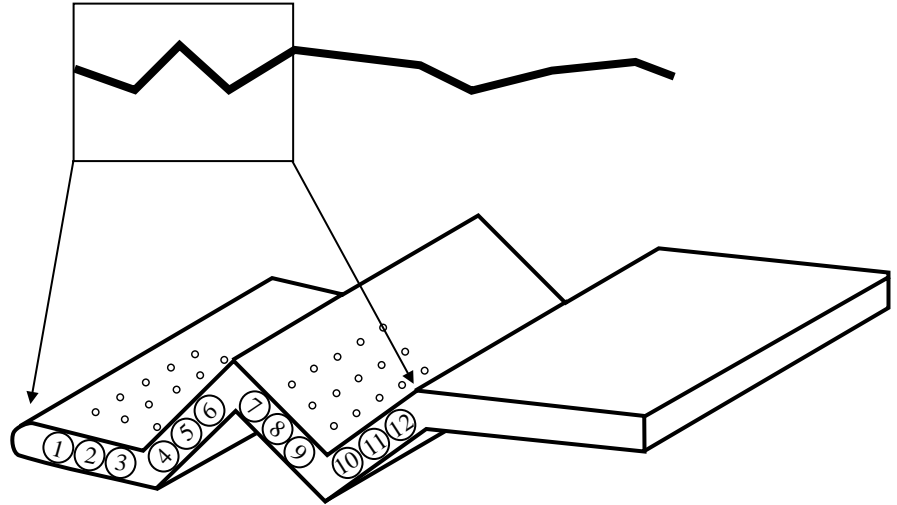

pressure measurements, was based on the front part of profile 1 (Fig. 3). Twelve metal pipes (diameter 4 mm) were spanwise integrated in the wing profile as shown in Fig. 3. Each pipe had five pressure holes (diameter 1 mm) on the upper and lower surfaces of the profile. The holes on the upper and lower surfaces could be closed as required. Profile 4 was a composite construction of wood, the metal pipes and brass sheets for the upper and lower surfaces.

#### Wind tunnel

A wind tunnel (Eifel-type) with an open working area was used. Outflow diameter was 0.46 m, and turbulence was 0.3–0.6%. A detailed description of the wind tunnel is given by Bilo (1979). The wind speed was adjustable between 0.5 and 15 m s<sup>-1</sup> and was determined using a hot-wire probe (TSI velocity transducer 8469). A thermometer and a barometer were used to measure temperature and atmospheric pressure, respectively. The wing profile holder was situated 0.18 m in front of the tunnel exit and was attached to the measuring system. The wing profiles, when mounted in the holder, were bounded at each end by the walls (without contact; distance from profile to wall <0.5 mm).

#### Force measurements

Lift  $L$  and drag  $D$  were recorded by means of a mechanically decoupled two-component balance on an air-cushion bearing. Because of the friction-free bearing, forces were transmitted without moments. These forces were separated into individual lift and drag forces by two perpendicularly oriented air-cushion sledges and transmitted in uniaxial movement. These movements induced the measuring probe to shift, and this displacement was measured *via* inductive displacement transducers. The transducer signals (recording time 10  $\mu$ s; sampling rate 0.3 Hz;  $N=20$ ) were amplified, low-pass-filtered and fed, using an A/D converter board (DYSIS PCI-07), into a computer, converted into ASCII format and processed using the calculation package EXCEL. To determine the influence of profile geometry on aerodynamic characteristics, all

measurement series ( $N=5$ ) were carried out at a Reynolds number ( $Re$ ) of 10 000, over the velocity range 1.4–2 m s<sup>-1</sup>. In addition, profile 1 was investigated at  $Re=7880$  and profile 4 at  $Re=9379$ . The Reynolds number  $Re=cU/\nu$ , where  $c$  is chord length,  $U$  is fluid velocity and  $\nu$  is the kinematic viscosity of the fluid (air), was taken as  $1.461 \times 10^{-5} \text{ m}^2 \text{ s}^{-1}$ .

A uniform  $Re$  disregards the fact that, despite having a variable chord length along the longitudinal axis, the speed of flow around the wing during gliding flight is constant, irrespective of longitudinal position. Since the chord length  $c$  at position  $0.3l_{\text{rel}}$  is only 78.8% of the chord length  $c$  at position  $0.7l_{\text{rel}}$  (at  $0.5l_{\text{rel}}$ ,  $c$  is 97% of that at  $0.7l_{\text{rel}}$ ), measurements were also carried out at  $Re=7880$  on profile 1.

$Re$  values of 7880 and 10 000 are both below the critical Reynolds number ( $Re_{\text{crit}}=3.2 \times 10^5$ ). At  $Re$  values below  $Re_{\text{crit}}$ , the boundary layer of the flowing fluid is laminar. At  $Re$  values higher than  $Re_{\text{crit}}$ , the boundary layer is turbulent, leading to delayed airflow breakaway and thus to a change in the wake effect, producing distinctly reduced drag.

However, the Reynolds numbers chosen, 7880 and 10 000, are distinctly higher than the biologically relevant range. Maximum speeds of 10 m s<sup>-1</sup> have been registered during flapping flight in free-flying dragonflies (*Aeshna cyanea*; Rüpell, 1989). With an assumed chord length  $c$  of approximately 0.01 m, this is equivalent to a Reynolds number of 7000. In the gliding flight relevant for this study, Wakeling and Ellington (1997) give a flight speed of approximately 2 m s<sup>-1</sup> (*Sympetrum sanguineum*), which gives a Reynolds number of approximately 1400.

To compare the results from this study with those available in the literature (e.g. Newman et al., 1977; Okamoto et al., 1996), the measurements were made using the 'customary' Reynolds number of 10 000. Since the aerodynamic forces lift and drag are largely dependent upon the Reynolds number or the velocity of flow (see equations 1, 2 and also 6), the results are only of limited relevance for the biological system of the dragonfly wing. But they are useful to emphasize the effects of the profile geometry on its aerodynamic characteristics.

Using the standard formulae:

$$C_L = L/(0.5\rho U^2 S), \quad (1)$$

$$C_D = D/(0.5\rho U^2 S), \quad (2)$$

where  $\rho$  is fluid density,  $U$  is fluid velocity and  $S$  is profile area, the dimensionless coefficients of lift  $C_L$  and drag  $C_D$  were calculated from the drag and lift forces. Total drag  $D$  is composed of pressure drag plus friction drag plus induced drag. The same is true for the drag coefficients:

$$C_D = C_{D,p} + C_{D,f} + C_{D,i}, \quad (3)$$

where  $C_{D,p}$  is the pressure drag coefficient,  $C_{D,f}$  is the friction drag coefficient and  $C_{D,i}$  is the induced drag coefficient. Since the wing profiles were limited at their upper and lower ends by a wall, they can be interpreted as having infinite length. This permits a two-dimensional aerodynamic analysis in which the induced drag can be neglected. Thus:

$$C_D = C_{D,p} + C_{D,f}. \quad (4)$$

Since the pressure drag of a flat plate at an angle of attack  $\alpha$  of  $0^\circ$  approaches zero in the subcritical  $Re$  range, total drag is then equivalent to frictional drag. Its coefficient can be calculated according to the Blasius equation for laminar boundary layers:

$$C_{D,f} = 2.66/Re^{0.5} \quad (5)$$

(Schlichting, 1979). For  $Re=10\,000$ , the expected minimum  $C_D$  value for an ideal flat plate with profile thickness  $t$  of zero at perfect laminar flow is, therefore,  $C_{D,\min}=C_{D,f}=0.0266$ . Because of irregularities in the boundary layer and because  $t>0$ , the measured value of  $C_{D,\min}$  should be greater than this value. An approximation is given by Ellington (1984) for  $Re$  from 100 to 10 000:

$$C_{D,\min} = 4.8/Re^{0.5}. \quad (6)$$

The aerodynamic performance of a wing during gliding can be determined by means of various  $C_L/C_D$  ratios. The gliding ratio  $\epsilon_R$ , where

$$\epsilon_R = (C_L/C_D), \quad (7)$$

gives the maximum gliding distance per unit height. The corresponding gliding angle  $\gamma$  can be calculated from:

$$\gamma = \arctan C_D/C_L. \quad (8)$$

The gliding ratio  $\epsilon_S$  gives the minimum sinking rate and is calculated from:

$$\epsilon_S = (C_L^3/C_D^2). \quad (9)$$

The gliding ratios  $\epsilon_R$  and  $\epsilon_S$  were determined by calculating the ratios  $C_L/C_D$  and  $C_L^3/C_D^2$  for each angle of attack  $\alpha$ . The maximum value represents  $\epsilon_R$  and  $\epsilon_S$ , respectively.

#### Pressure measurements

Pressure measurements ( $N=3$ ) were made with a micro-pressure gauge and profile 4. The pressure values  $p_0$  obtained were calculated as dimensionless coefficients of pressure  $C_P$ :

$$C_P = (p_0 - p_\infty)/0.5\rho U^2, \quad (10)$$

where  $p_0$  is the measured static pressure of profile,  $p_\infty$  is the static pressure of flow and  $0.5\rho U^2$  is the dynamic pressure, for  $\alpha=-10^\circ$  to  $+10^\circ$  in  $5^\circ$  steps and  $U=1.74\text{ m s}^{-1}$  ( $Re=9300$ ).

## Results

None of the profiles analysed at  $Re=10\,000$  and at the higher angles of attack showed any sign of either a spontaneous collapse of lift or of flow breaking away. The only exception was the curved plate: a spontaneous collapse of lift was registered at a critical angle of attack  $\alpha_{\text{crit}}$  of  $+10^\circ$ ; at this angle of attack, the lift coefficient  $C_{L,\text{crit}}$  was approximately equal to the maximum lift coefficient  $C_{L,\text{max}}$ . Since the increase in lift stagnated at  $8-10^\circ$  in all profiles at  $Re=10\,000$ , and only began to increase again at much higher angles of attack,  $+8^\circ$  or  $+10^\circ$  was taken to be  $\alpha_{\text{crit}}$  for all profiles at  $Re\ 10\,000$  (Table 2).

#### The 'technical' profiles

As expected, the flat plate with  $C_{L,\text{crit}}=0.773$  and  $\epsilon_R=6.718$  ( $\epsilon_S=26.948$ ) generates the least lift, but with  $C_{D,\min}=0.041$  also the lowest coefficient of drag (Fig. 4). The curved plate shows favourable aerodynamic characteristics ( $\epsilon_R=9.323$ ;  $\epsilon_S=95.19$ ). Considerable lift (28% of  $C_{L,\text{crit}}$ ) is obtained at an angle of attack of  $0^\circ$ , but also a higher value for  $C_{D,\min}=0.078$ . At the critical angle of attack ( $\alpha_{\text{crit}}=10^\circ$  and  $C_{L,\text{crit}}=1.284$ ), flow suddenly breaks away and lift collapses. At higher angles of attack ( $\alpha>20^\circ$ ), lift begins to increase again (Fig. 4A). The aerodynamic characteristics of the asymmetric profile can be interpreted as a compromise between the flat and cambered plates:  $C_{L,\text{crit}}=1.004$ ,  $C_{D,\min}=0.054$ ,  $\epsilon_R=8.068$  and  $\epsilon_S=40.602$ .

#### The wing profiles (profiles 1, 2 and 3)

Measurements at  $Re=10\,000$  show that the different cross-sectional geometries along the longitudinal axis of the wing are correlated with different aerodynamic characteristics (Fig. 5). With  $C_{L,\text{crit}}=0.953$ ,  $C_{D,\min}=0.053$  and a gliding ratio  $\epsilon_R$  of 7.351 ( $\epsilon_S=34.927$ ), the aerodynamic performance of profile 1 is relatively high, but with  $C_{L,\text{crit}}=0.999$ ,  $C_{D,\min}=0.06$ ,  $\epsilon_R=7.868$  and  $\epsilon_S=50.636$ , the performance of profile 3 exceeds these values. Both profiles have very similar polar plots (Fig. 5B). By comparison, the values obtained for profile 2 ( $C_{L,\text{crit}}=0.698$ ;  $C_{D,\min}=0.049$ ;  $\epsilon_R=6.528$ ;  $\epsilon_S=22.543$ ) are very similar to those of the flat plate (Fig. 4), and their polar plots are also very similar.

Reducing  $Re$  from 10 000 to 7880 in profile 1 (profile 1\* in Table 2) led to a distinct reduction in the gliding ratios  $\epsilon_R$  (to 6.306) and  $\epsilon_S$  (to 27.202) and to an increase in  $C_{D,\min}$  to 0.061 (Fig. 6).

#### The 'filled' profiles (profiles 1A, 2A and 3A)

Filling the 'valleys' in the wing profiles (see Fig. 2) led to a distinct deterioration in lift production (Fig. 7). The mean gliding ratio  $\epsilon_R$  for these three profiles is only 5.07 (mean

Table 2. Aerodynamic characteristics of the profiles

| Profile                               | Flat plate     | Curved plate   | Asymmetric profile | 1              | 1*             | 2              | 3              | 1A                      | 2A              | 3A             | 4              |
|---------------------------------------|----------------|----------------|--------------------|----------------|----------------|----------------|----------------|-------------------------|-----------------|----------------|----------------|
| $C_{L,crit}$                          | 0.773          | 1.284          | 1.004              | 0.953          | 0.968          | 0.698          | 0.999          | 0.723                   | 0.641           | 0.647          | 0.552          |
| $C_{D,crit}$                          | 0.165          | 0.176          | 0.160              | 0.208          | 0.311          | 0.124          | 0.175          | 0.125                   | 0.138           | 0.135          | 0.170          |
| $C_{L,max}$                           | 1.209          | 1.330          | 1.182              | 1.373          | 1.334          | 1.170          | 1.410          | 1.081                   | 0.953           | 1.037          | 1.042          |
| $C_{L,0}$                             | 0.022          | 0.355          | 0.390              | 0.270          | 0.185          | 0.053          | 0.262          | 0.079                   | 0.016           | 0.040          | -0.130         |
| $C_{D,0}$                             | 0.041          | 0.078          | 0.054              | 0.053          | 0.061          | 0.049          | 0.060          | 0.044                   | 0.040           | 0.047          | 0.130          |
| $C_{D,min}$<br>( $\alpha$ , degrees)  | 0.041<br>(0)   | 0.078<br>(0)   | 0.054<br>(0)       | 0.053<br>(0)   | 0.061<br>(0)   | 0.049<br>(0)   | 0.060<br>(0)   | 0.044<br>(0)            | 0.040<br>(0)    | 0.047<br>(0)   | 0.127<br>(+2)  |
| $\alpha_{crit}$ (degrees)             | +10            | +10            | +8                 | +10            | +15            | +10            | +10            | +8                      | +10             | +8             | +10            |
| $\alpha_0$ (degrees)<br>( $C_L$ )     | 0<br>(0.022)   | -4<br>(-0.087) | -4<br>(-0.024)     | -4<br>(-0.045) | -2<br>(0.018)  | 0<br>(0.053)   | -2<br>(0.081)  | 0/-2<br>( $\pm 0.079$ ) | 0<br>(0.016)    | 0<br>(0.040)   | +2<br>(-0.063) |
| $\epsilon_R$<br>( $\alpha$ , degrees) | 6.718<br>(+6)  | 9.323<br>(+6)  | 8.068<br>(+2)      | 7.351<br>(+4)  | 6.306<br>(+4)  | 6.528<br>(+6)  | 7.868<br>(+6)  | 5.790<br>(+8)           | 4.629<br>(+10)  | 4.791<br>(+8)  | 3.248<br>(+10) |
| $\gamma$ (degrees)                    | 8.466          | 6.122          | 7.065              | 7.747          | 9.011          | 8.709          | 7.243          | 9.798                   | 12.191          | 11.789         | 17.112         |
| $\epsilon_S$<br>( $\alpha$ , degrees) | 26.948<br>(+6) | 95.190<br>(+8) | 40.602<br>(+2)     | 34.927<br>(+6) | 27.202<br>(+6) | 22.543<br>(+8) | 50.636<br>(+6) | 24.256<br>(+8)          | 13.731<br>(+10) | 14.861<br>(+8) | 5.824<br>(+10) |

For all profiles except 1\*,  $Re=10000$ ; for profile 1\*,  $Re=7880$ .

$C_{L,crit}$ , lift coefficient at  $\alpha_{crit}$ ;  $C_{D,crit}$ , drag coefficient at  $\alpha_{crit}$ ;  $C_{L,max}$ , lift coefficient at  $\alpha=40^\circ$ ;  $C_{L,0}$ , lift coefficient at  $\alpha=0^\circ$ ;  $C_{D,0}$ , drag coefficient at  $\alpha=0^\circ$ ;  $C_{D,min}$ , minimum drag coefficient;  $\alpha_{crit}$ , critical angle of attack;  $\alpha$ , angle of attack,  $\alpha_0$ ,  $\alpha$  at  $C_L=0$ ;  $\epsilon_R$ ,  $\epsilon_S$ , gliding ratio for maximum range or minimum sinking, respectively;  $\gamma$ , gliding angle.

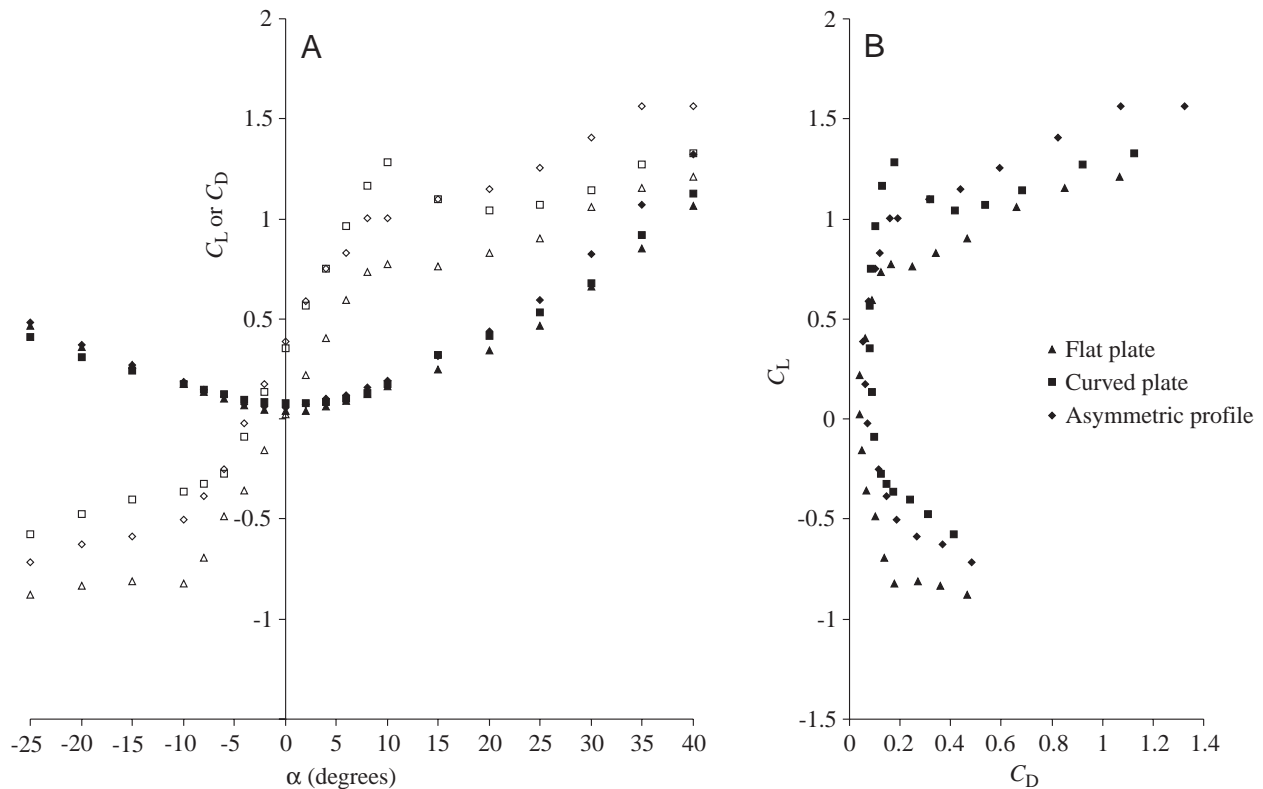

Fig. 4. (A) Drag  $C_D$  and lift  $C_L$  coefficients versus angle of attack  $\alpha$  for the ‘technical’ profiles. Open symbols,  $C_L$ ; filled symbols,  $C_D$ ; Reynolds number  $Re=10000$ . (B) Polar diagrams for the ‘technical’ profiles. Values are means ( $N=5$ ); all errors are smaller than the symbol size. Flat plate  $s_{c,L}<0.9\%$ ,  $s_{c,D}<2.6\%$ ; curved plate  $s_{c,L}<1.1\%$ ,  $s_{c,D}<1.7\%$ ; asymmetric profile  $s_{c,L}<0.9\%$ ,  $s_{c,D}<2.1\%$ , where  $s_{c,L}$  is the standard error of the  $C_L$  and  $s_{c,D}$  is that of the  $C_D$ .

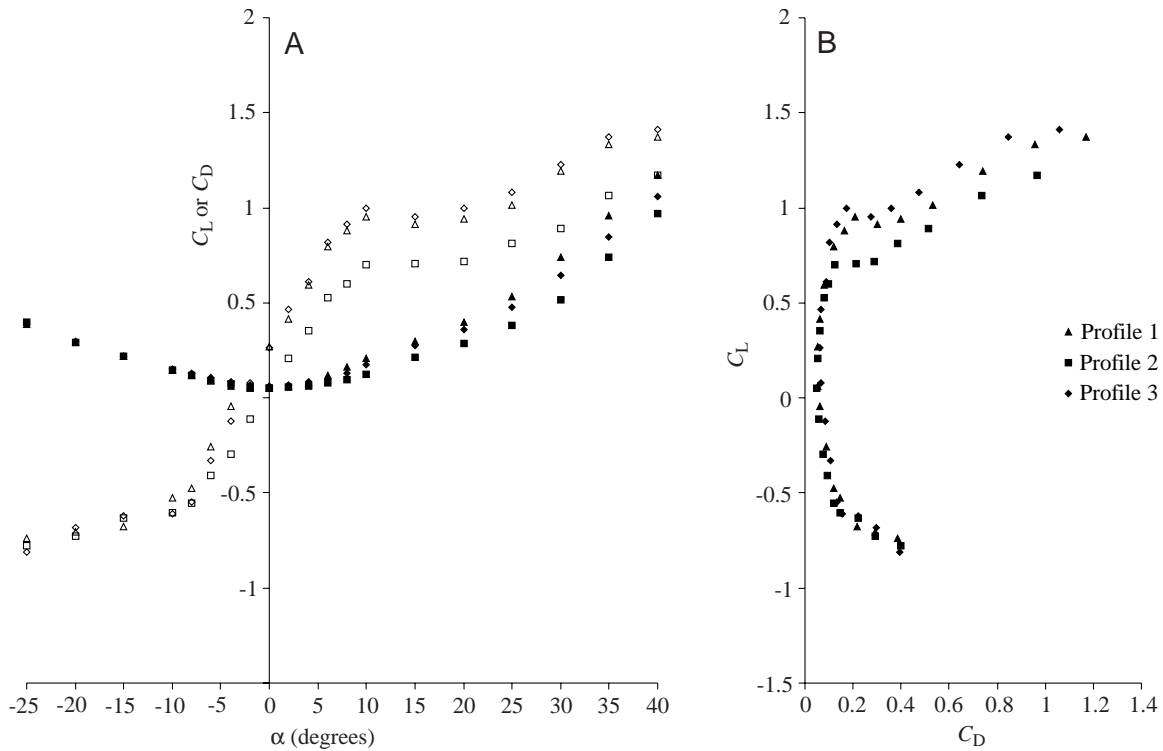

Fig. 5. (A) Drag  $C_D$  and lift  $C_L$  coefficients versus angle of attack  $\alpha$  for wing profiles 1, 2 and 3 (see Fig. 2). Open symbols,  $C_L$ ; filled symbols,  $C_D$ ; Reynolds number  $Re=10000$ . (B) Polar diagrams for profiles 1, 2 and 3. Values are means ( $N=5$ ); all errors are smaller than the symbol size. Profile 1  $s_{c,L}<1.1\%$ ,  $s_{c,D}<1.3\%$ ; profile 2  $s_{c,L}<0.7\%$ ,  $s_{c,D}<2.4\%$ ; profile 3  $s_{c,L}<0.9\%$ ,  $s_{c,D}<1.2\%$ , where  $s_{c,L}$  and  $s_{c,D}$  are the standard error of  $C_L$  and  $C_D$  measurements, respectively.

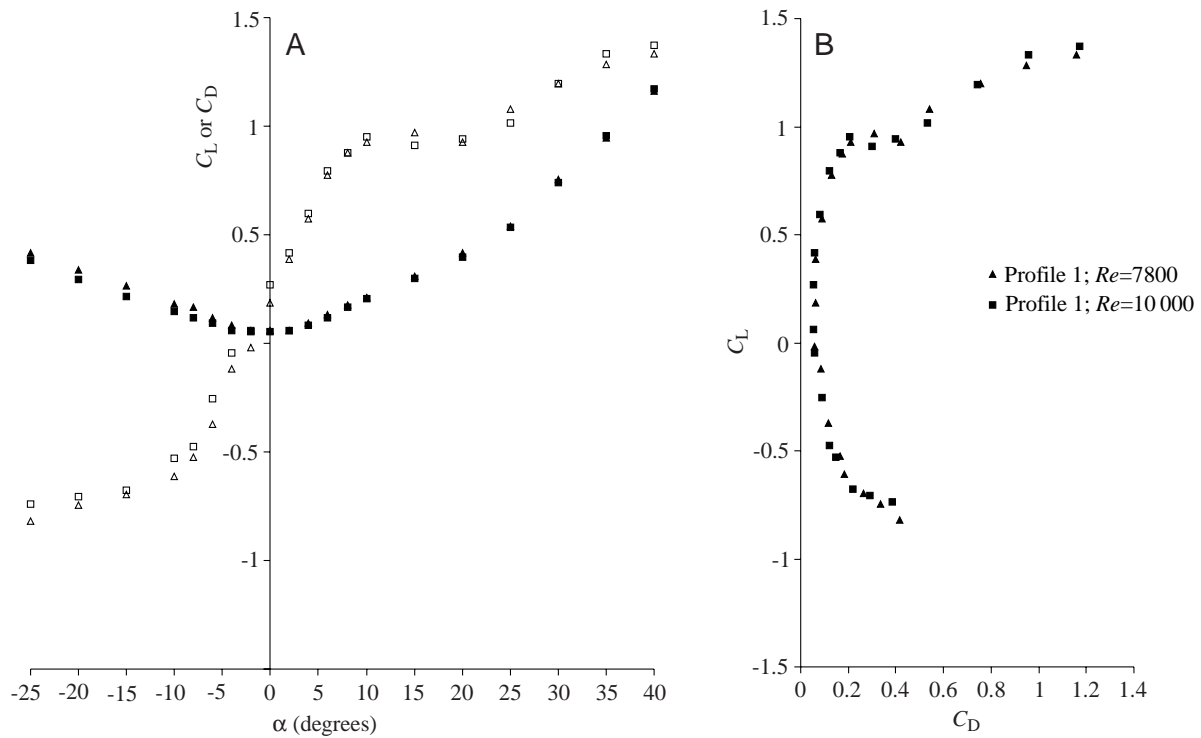

Fig. 6. (A) Drag  $C_D$  and lift  $C_L$  coefficients versus angle of attack  $\alpha$  for wing profile 1 at  $Re=7880$  and  $10000$ . Open symbols,  $C_L$ ; filled symbols,  $C_D$ . (B) Polar diagrams for profile 1 at  $Re=7880$  and  $10000$ . Values are means ( $N=5$ ); all standard errors are smaller than the symbol size. Errors for  $C_L$  ( $s_{c,L}$ ) and  $C_D$  ( $s_{c,D}$ ) are:  $Re\ 7880$   $s_{c,L}<0.65\%$ ,  $s_{c,D}<2.1\%$ ;  $Re\ 10000$   $s_{c,L}<1.1\%$ ,  $s_{c,D}<1.3\%$ , where  $s_{c,L}$  and  $s_{c,D}$  are the standard error of  $C_L$  and  $C_D$  measurements, respectively.

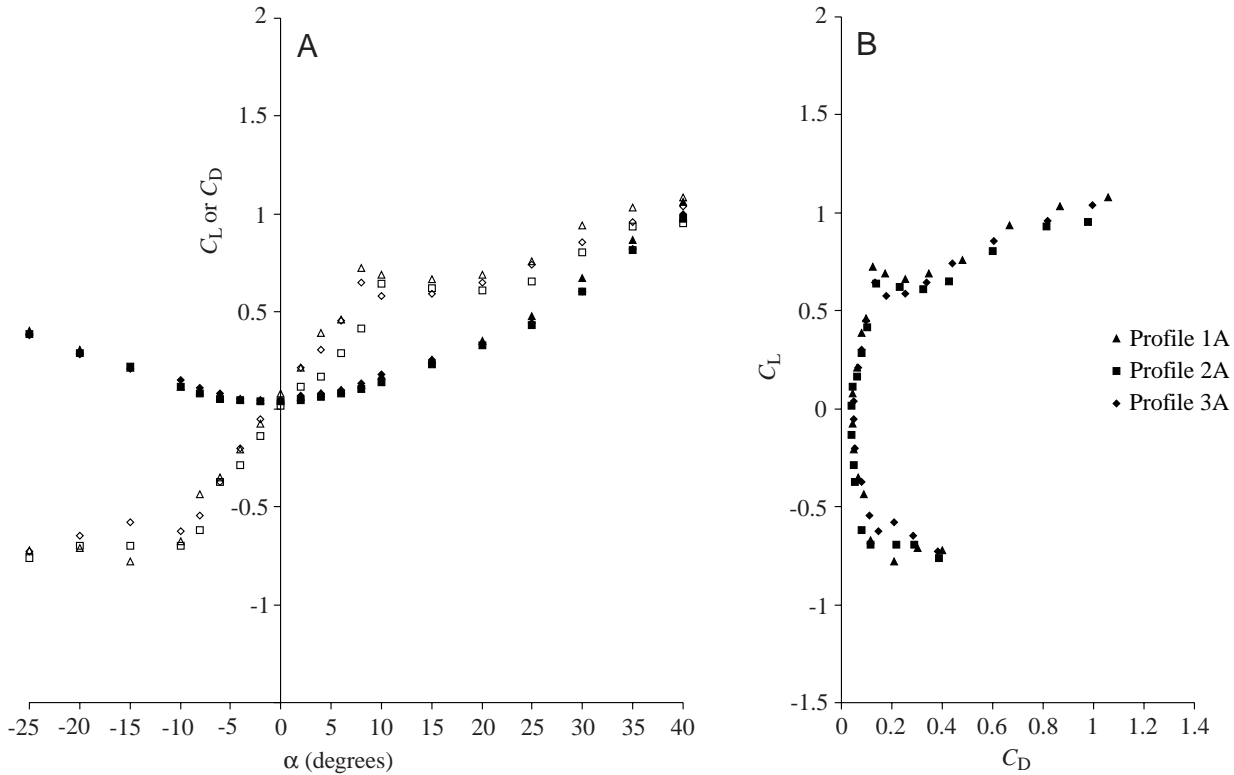

Fig. 7. (A) Drag  $C_D$  and lift  $C_L$  coefficients *versus* angle of attack  $\alpha$  for wing profiles 1A, 2A and 3A (see Fig. 2). Open symbols,  $C_L$ ; filled symbols,  $C_D$ ; Reynolds number  $Re=10\,000$ . (B) Polar diagrams for profiles 1A, 2A and 3A. Values are means ( $N=5$ ). All standard errors are smaller than the symbol size. Profile 1A  $s_{c,L}<0.7\%$ ,  $s_{c,D}<2.5\%$ ; profile 2A  $s_{c,L}<0.7\%$ ,  $s_{c,D}<2.6\%$ ; profile 3A  $s_{c,L}<1.1\%$ ,  $s_{c,D}<2.8\%$ , where  $s_{c,L}$  and  $s_{c,D}$  are the standard error of  $C_L$  and  $C_D$  measurements, respectively.

$\epsilon_S=17.62$ ). The polar plots become more symmetrical and approach those of the flat plate (Fig. 4). Correspondingly, these profiles show lower  $C_{D,min}$  values than the unfilled wings (Table 2).

*The pressure measurements (profile 4)*

The pressure measurements or calculated  $C_P$  values show that, at angles of attack from  $-10^\circ$  to  $0^\circ$ , wide areas of negative pressure can be detected on both the upper and lower surfaces of the wing (Figs 8, 9). Furthermore, differences between the first two valleys (see Fig. 3) were found on the upper surface. Fig. 10 shows that only at  $\alpha>0^\circ$  was sufficient net negative pressure generated to produce lift. This result corresponds to the  $C_L/C_D$  analyses (Fig. 11). As expected, the exaggerated height of this wing profile impacted strongly on its aerodynamic performance, and the gliding ratios were the lowest measured:  $\epsilon_R=3.248$  and  $\epsilon_S=5.824$  ( $C_{D,min}=0.127$ ;  $C_{L,crit}=0.552$ ). Lift was produced only over positive angles of attack ( $\alpha$  greater than  $+2^\circ$ ), but increased rapidly as  $\alpha$  increased.

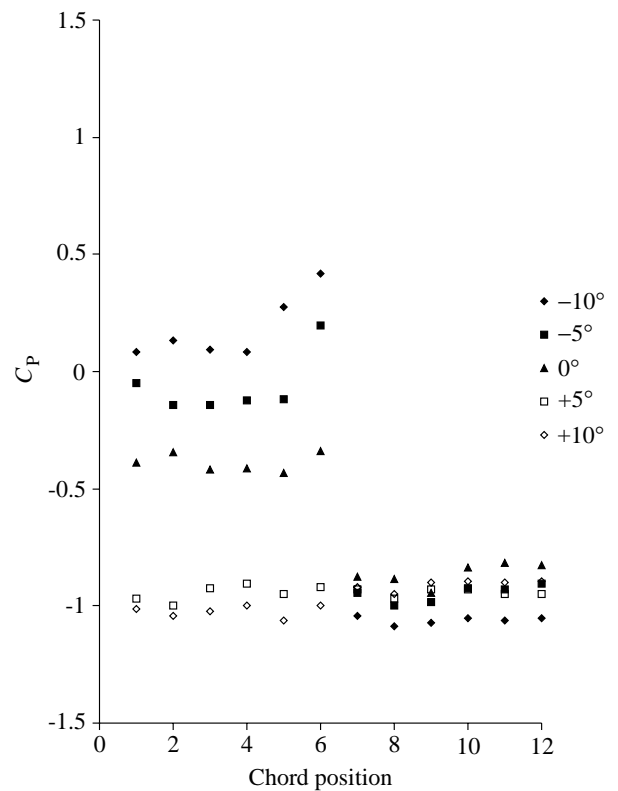

Fig. 8. Pressure coefficient  $C_P$  on upper side of the wing profile 4 *versus* chord positions 1–12 (see Fig. 3) for values of angle of attack  $\alpha$  between  $-10^\circ$  and  $+10^\circ$  at a Reynolds number of 9300. Values are means ( $N=3$ ); mean standard error of  $C_P<8.7\%$ .

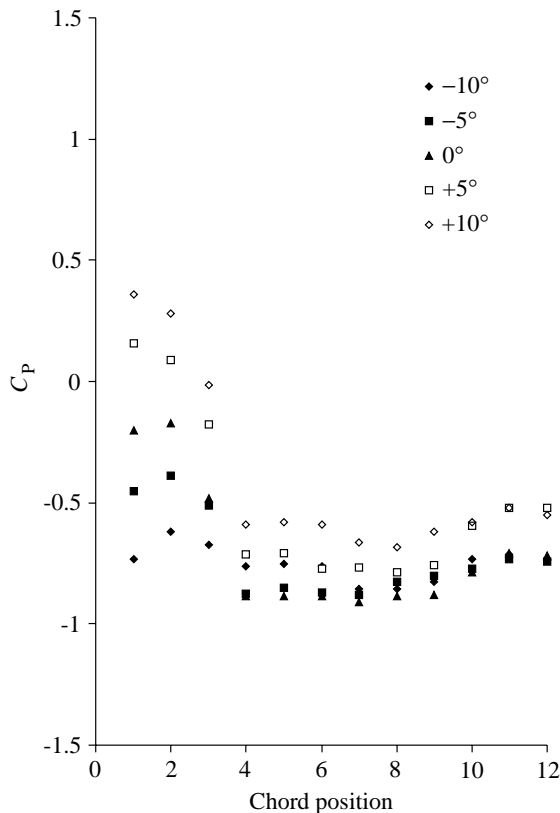

Fig. 9. Pressure coefficient  $C_p$  on the lower side of the wing profile 4 versus chord positions 1–12 (see Fig. 3) for values of angle of attack  $\alpha$  between  $-10^\circ$  and  $+10^\circ$  at a Reynolds number of 9300. Values are means ( $N=3$ ); mean standard error of  $C_p < 9.3\%$ .

## Discussion

### The 'technical' profiles

A slightly cambered aerofoil (the curved plate) at  $Re=10\,000$  performs best as far as the production of lift is concerned. However, it also produces more drag because of its concave lower surface. Lower  $C_{D,\min}$  values are produced by the flat plate. The measured  $C_{D,\min}$  of 0.041 corresponds well with the value of 0.04 ( $t/c=3.3\%$ ;  $Re=11\,000$ ) obtained by Okamoto et al. (1996) with comparable plates and with the expected value of 0.048 calculated from equation 6.

However, neither the flat nor the curved plate fulfils the static demands of an insect wing. To obtain the necessary load-bearing capacity, a thicker wing with much higher material expenditure would be required. This would have a negative effect on the  $t/c$  ratio and, thus, on the aerodynamic performance (Okamoto et al., 1996; Sunada et al., 1997). The aerodynamic compromise provided by the asymmetric profile will also be very unfavourable as far as drag and material expenditure are concerned. Thus, to achieve the impressive relationship between material expenditure and stability seen in a dragonfly wing, the corrugated design of the wing appears to be indispensable.

### The wing profiles

Analysis of the  $C_L/C_D$  characteristics of the wing profiles,

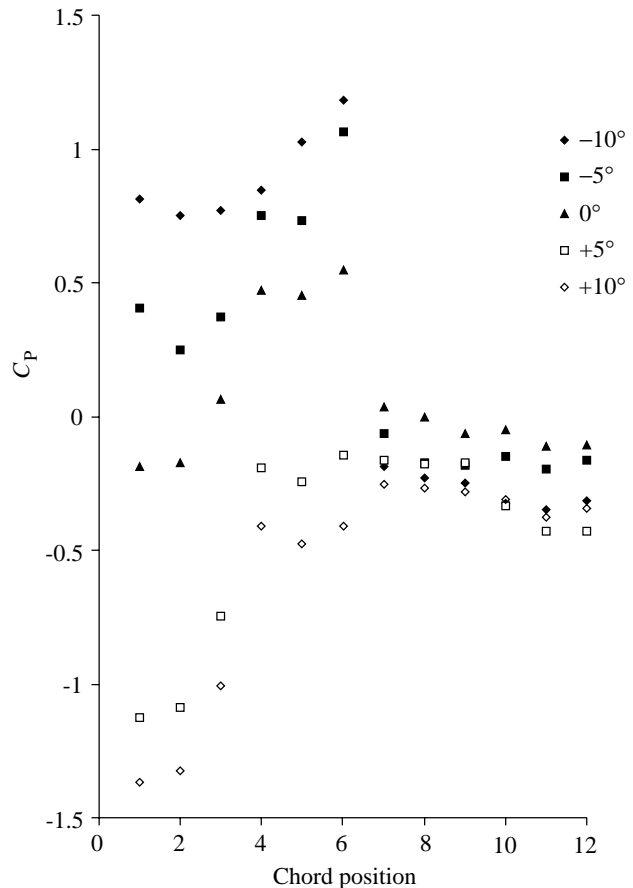

Fig. 10. Differences in the pressure coefficient  $C_p$  between the upper and lower side of wing profile 4 versus chord position (see Fig. 3) at angles of attack  $\alpha$  between  $-10^\circ$  and  $+10^\circ$  at a Reynolds number of 9300. Values are means ( $N=3$ ); mean standard error of  $C_p < 9.3\%$ .

including profile 4, did not produce the extraordinary polar plots described by Newman et al. (1977), but plots much more comparable with those of the technical profiles. At an identical  $Re$  (10000), different cross-sectional geometries along the longitudinal axis can be correlated with different aerodynamic characteristics.

Whilst profile 2 behaves somewhat like a flat plate, profiles 1 and 3 are similar to the asymmetric technical profile, not only in the values of the aerodynamic variables attained, but also in the form of their polar plots. These similarities are surprising given that the leading edges of the profiles are orientated in opposite directions. Whereas profile 1 has an upward-facing leading edge, that of profile 3, which is situated distinctly distal from the nodus, faces downwards (see Figs 1, 2). These findings contradict those of Okamoto et al. (1996), who found the aerodynamic characteristics of a profile to be dependent upon the orientation of the leading edge. Okamoto et al. (1996) used profiles with symmetrical corrugations at regular intervals along the chord length. In addition, the leading and trailing edges of the profiles were orientated in the same direction. Thus, their arrangement produced a positive camber (both edges face downwards, as in the curved plate in the present



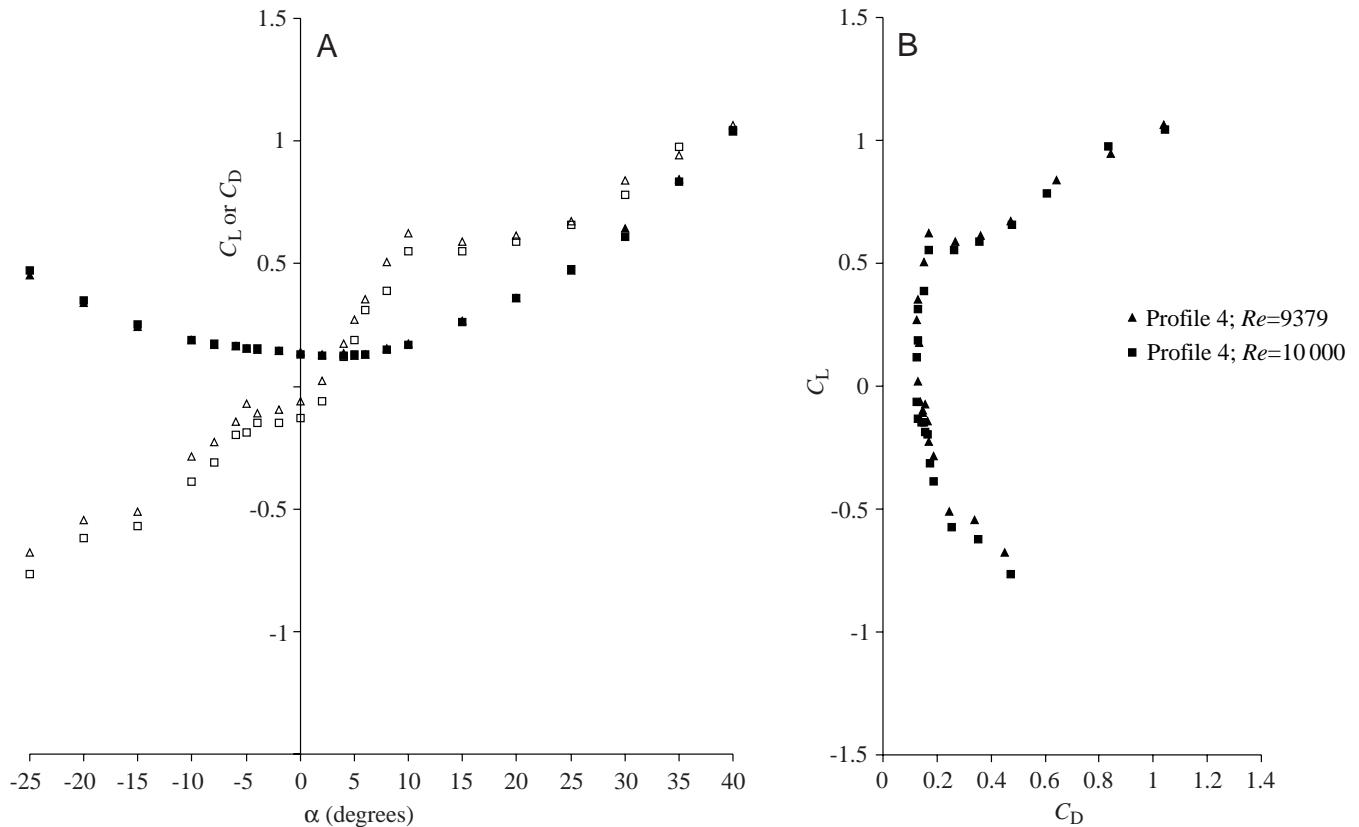

Fig. 11. (A) Drag  $C_D$  and lift  $C_L$  coefficients versus angle of attack  $\alpha$  for profile 4 at Reynolds numbers of 9379 and 10000. Open symbols,  $C_L$ ; filled symbols,  $C_D$ . (B) Polar diagrams for profile 4. Values are means ( $N=5$ ). Standard errors are smaller than the symbol size.  $Re=9379$ ,  $s_{c,L}<0.7\%$ ,  $s_{c,D}<2.2\%$ ;  $Re=10000$ ,  $s_{c,L}<0.7\%$ ,  $s_{c,D}<2.3\%$ .

study) or a negative camber (both edges face upwards). The profiles based on a wing of *A. cyanea* in the present study have an irregular corrugation that decreases along the chord length. Furthermore, the trailing edge is always orientated downwards (see Fig. 2). Thus, the wing profiles are similar to the curved plate and asymmetric profile in the presence of a positive camber and in aerodynamic characteristics. Because of the downward-facing leading edge of profile 3, a stronger camber (6%) exists than in profile 1 (4%), resulting in increased lift production ( $C_{L,crit} +5\%$ ,  $\epsilon_R +7\%$ ,  $\epsilon_S$  greater than +30%).

However, the relatively low  $C_{D,min}$  values found in wing profiles 1–3 contradict the interpretation that the wing functions primarily as a cambered plate. These values correspond better to those for the flat plate or the asymmetric profile.

The chord length of a real dragonfly wing varies along its length. Under identical flow velocities during gliding, this will result in an  $Re$  reduced by a factor of 0.788 in the proximally slimmer profile 1. At  $Re=7880$ , although the aerodynamic performance of profile 1 is reduced by approximately  $-16.6\%$  ( $\epsilon_R$ ) or  $-28.4\%$  ( $\epsilon_S$ ) compared with  $Re=10000$ , and  $C_{D,min}$  increases by approximately 13.1%, the relatively high coefficients of drag correspond well to the  $Re$ -dependent increase in drag of 12.7% expected from equations 5 and 6. The principal lift/drag characteristics of the profile are retained.

The ‘filled’ profiles 1A, 2A and 3A also achieve more favourable  $C_{D,min}$  values compared with flat plates with a comparable  $t/c$  ratio. For flat plates, Okamoto et al. (1996) obtained  $C_{D,min}$  values of 0.056 and 0.1 for  $t/c=5\%$  and 10%, respectively. This reduction can be explained by the geometrically more favourable form of the leading edge (see Fig. 2) of the ‘filled’ profiles. Nevertheless, their lift production is less favourable than those of profiles 1 and 3, so that it is clear that the performance of the unfilled profiles is not simply caused by the filling of the profile valleys with part of the surrounding air, but rather that the lift-increasing effect of a cambered geometry is at least partly preserved. To summarise, an effective profile form, producing lift like the asymmetric profile, a thin full profile with a longitudinally drawn out tail, but with drag corresponding to that of a flat plate, seems to be induced by the vortices rotating on the profile of a dragonfly wing.

Actual measurements with dragonfly wings have shown that lift production is high, with  $C_{L,max}=1.05$ – $1.07$  (*Sympetrum sanguinea*; Wakeling and Ellington, 1997) and 1.05–1.2 (*Anax parthenope julius*; Azuma and Watanabe, 1988; Okamoto et al., 1996). These values are much higher than those determined in other species, e.g.  $C_{L,max}$  0.7–0.9 (Nachtigall, 1977a,b; Wakeling and Ellington, 1997; Ellington, 1999). Wakeling and Ellington (1997) state explicitly that the increased lift

production cannot be due to the  $Re$ , to the aspect ratio  $\mathcal{AR}$  or to the absolute wing area. Thus, other factors must be responsible for the high lift production of dragonfly wings. A plausible candidate for this is the cross-sectional corrugation, a type of profile particularly pronounced in dragonflies and surpassed only by that in the forewing of a locust. As Zarnack (1982) reported, the forewing of a locust forms a characteristic profile during the up- and downstrokes during flapping flight. In fact, the highest recorded values of  $C_{L,max}$  (1.3) are for a locust *Schistocerca gregaria* forewing with a downstroke-like corrugation (Jensen, 1956). Here, too, comparable measurements on a flat forewing ( $C_{L,max}=1.13$ ) show that the high  $C_L$  is produced by the cross-sectional configuration of the wing.

Buckholz (1986) demonstrated that such corrugation causes an increase in negative pressure on the upper surface of the profile and, thus, an increase in lift production. But his analyses did not extend to the pressure relationship on the lower profile surface. Since negative pressure is found in all profile valleys, regardless of the profile side, a negative coefficient of pressure is not automatically correlated with greater lift production. Thus, in profiles with symmetrical and uniform corrugation, an increase in lift cannot be predicted from local increases in negative pressure in the profile valleys. The geometric construction, and in particular the sequence of bends and edges over the chord length, plays an important role in the lift production of a wing. An increase in lift due to the vortex system can only be attained if the geometry is optimally tuned. Thus, the primarily static requirements of the cross-sectional configuration will undergo aerodynamically necessary fine tuning, not only over the chord length but also over the span length. This may explain the gradual widening of the wing from the joint up to approximately  $0.7l_{rel}$ , particularly the reorientation of the leading edge at the nodus. To support wing function, particularly the varying longitudinal torsion of the wing during the up- and downstrokes, the configuration of the veins at the base of the wing is critical. The leading edge geometry resulting from the demands on the joint is, however, aerodynamically less favourable and is aerodynamically optimised at the first possible position, i.e. at the nodus. Therefore, the dragonfly wing can be interpreted as a multi-criterion answer to the conflict between static and dynamic demands.

#### List of symbols

|                |                                      |
|----------------|--------------------------------------|
| $\mathcal{AR}$ | aspect ratio ( $l/c$ )               |
| $c$            | chord length (m)                     |
| $C_D$          | drag coefficient                     |
| $C_{D,crit}$   | drag coefficient at $\alpha_{crit}$  |
| $C_{D,p}$      | pressure drag coefficient            |
| $C_{D,f}$      | friction drag coefficient            |
| $C_{D,i}$      | induced drag coefficient             |
| $C_{D,min}$    | minimum drag coefficient             |
| $C_{D,0}$      | drag coefficient at $\alpha=0^\circ$ |
| $C_L$          | lift coefficient                     |

|                 |                                                                |
|-----------------|----------------------------------------------------------------|
| $C_{L,crit}$    | lift coefficient at $\alpha_{crit}$                            |
| $C_{L,max}$     | maximum lift coefficient                                       |
| $C_{L,0}$       | lift coefficient $\alpha=0^\circ$                              |
| $C_p$           | pressure coefficient                                           |
| $D$             | drag (N)                                                       |
| $l$             | span length (m)                                                |
| $l_{rel}$       | relative span length                                           |
| $L$             | lift (N)                                                       |
| $N$             | number of measurements                                         |
| $p_0$           | measured pressure (Pa)                                         |
| $p_\infty$      | static pressure of flow (Pa)                                   |
| $r$             | radius of leading edge (m)                                     |
| $Re$            | Reynolds number                                                |
| $Re_{crit}$     | critical Reynolds number                                       |
| $S$             | area of profile (m <sup>2</sup> )                              |
| $S_{c,D}$       | standard error of $C_D$ (%)                                    |
| $S_{c,L}$       | standard error of $C_L$ (%)                                    |
| $t$             | thickness of profile (m)                                       |
| $T$             | thrust (N)                                                     |
| $U$             | velocity of fluid (m s <sup>-1</sup> )                         |
| $\alpha$        | angle of attack (degrees)                                      |
| $\alpha_0$      | angle of attack (at $C_L=0$ ) (degrees)                        |
| $\alpha_{crit}$ | critical angle of attack (degrees)                             |
| $\gamma$        | gliding angle (degrees)                                        |
| $\epsilon_R$    | gliding ratio (maximum range)                                  |
| $\epsilon_S$    | gliding ratio (minimum sinking)                                |
| $\nu$           | kinematic viscosity of fluid (m <sup>2</sup> s <sup>-1</sup> ) |
| $\rho$          | density of fluid (kg m <sup>-3</sup> )                         |

I would like to thank Katja Schmitt and Klaus Stockhum for technical assistance, Winifred Pattullo for the translation and also two anonymous referees for their critical and important comments on the manuscript.

#### References

- Azuma, A. and Watanabe, T. (1988). Flight performance of a dragonfly. *J. Exp. Biol.* **137**, 221–252.
- Bender, H.-W. (1987). *Modellflug-Profilesammlung*. Baden-Baden: Verlag für Technik und Handwerk.
- Bilo, D. (1979). About methods to analyse kinematics and aerodynamics of flight of small birds. *Dt. Zool. Ges.* **64**, 136–142.
- Buckholz, R. H. (1986). The functional role of wing corrugation in living systems. *J. Fluids Engineer.* **108**, 93–97.
- Ellington, C. P. (1984). The aerodynamics of hovering insect flight. IV. Aerodynamic mechanisms. *Phil. Trans. R. Soc. Lond. B* **305**, 79–113.
- Ellington, C. P. (1999). The novel aerodynamics of insect flight: applications to micro-air vehicles. *J. Exp. Biol.* **202**, 3439–3448.
- Hertel, H. (1963). *Struktur, Form und Bewegung*. Mainz: Krauskopf Verlag.
- Jensen, M. (1956). Biology and physics of locust flight. III. The aerodynamics of locust flight. *Phil. Trans. R. Soc. B* **239**, 511–552.
- Kesel, A. B. (1998). Biologisches Vorbild Insektenflügel – Mehrkriterienoptimierung ultraleichter Tragflächen. In *Biona-Report 12* (ed. W. Nachtigall and A. Wisser), pp. 107–117. Stuttgart, New York: Fischer.

- Kesel, A. B., Philippi, U. and Nachtigall, W.** (1998). Biomechanical aspects of insect wings – an analysis using the finite element method. *Comp. Biol. Med.* **28**, 423–437.
- May, M. L.** (1995a). Simultaneous control of head and thoracic temperature by the green darner dragonfly *Anax junius* (Odonata: Aeshnidae). *J. Exp. Biol.* **198**, 2373–2384.
- May, M. L.** (1995b). Dependence of flight behavior and heat production on air temperature in the green darner dragonfly *Anax junius* (Odonata: Aeshnidae). *J. Exp. Biol.* **198**, 2385–2392.
- Nachtigall, W.** (1977a). Zur Bedeutung der Reynoldszahl und der damit zusammenhängenden strömungsmechanischen Phänomene in der Schwimmphysiologie und Flugbiophysik. *Fortschr. Zool.* **24**, 14–56.
- Nachtigall, W.** (1977b). Die aerodynamische Polare des Tipula-Flügels und eine Einrichtung zur halbautomatischen Polarenaufnahme. *Fortschr. Zool.* **24**, 347–352.
- Newman, B. G., Savage, S. B. and Schouella, D.** (1977). Model test on a wing section of a dragonfly. In *Scale Effects in Animal Locomotion* (ed. T. J. Pedley), pp. 445–477. London: Academic Press.
- Newman, D. J. S. and Wootton, R. J.** (1986). An approach to the mechanics of pleating in dragonfly wings. *J. Exp. Biol.* **125**, 361–372.
- Okamoto, M., Yasuda, K. and Azuma, A.** (1996). Aerodynamic characteristics of the wings and body of a dragonfly. *J. Exp. Biol.* **199**, 281–294.
- Rees, C. J. C.** (1975a). Form and function in corrugated insect wings. *Nature* **256**, 200–203.
- Rees, C. J. C.** (1975b). Aerodynamic properties of an insect wing section and a smooth aerofoil compared. *Nature* **258**, 141–142.
- Rudolph, R.** (1978). Aerodynamical properties of *Libellula quadrimaculata* L. (Anisoptera: Libellulidae) and the flow around smooth and corrugated wing section models during gliding flight. *Odonatologica* **7**, 49–58.
- Rüppel, G.** (1989). Kinematic analysis of symmetrical flight manoeuvres of Odonata. *J. Exp. Biol.* **144**, 13–42.
- Rüppel, G. and Hilfert, D.** (1993). The flight of the relict dragonfly *Epiophlebia superstes* (Selys) in comparison with that of modern Odonata (Anisozygoptera: Epiophlebiidae). *Odonatologica* **22**, 295–309.
- Schlichting, H.** (1979). *Boundary-Layer Theory*. New York: McGraw Hill.
- Sunada, S., Sakaguchi, A. and Kawachi, K.** (1997). Airfoil section characteristics at a low Reynolds number. *J. Fluids Engineer.* **119**, 129–135.
- Wakeling, J. M. and Ellington, C. P.** (1997). Dragonfly flight. I. Gliding flight and steady-state aerodynamic forces. *J. Exp. Biol.* **200**, 543–556.
- Wootton, R. J.** (1991). The functional morphology of the wings of Odonata. *Adv. Odonatol.* **5**, 153–169.
- Wootton, R. J.** (1992). Functional morphology of insect wings. *Annu. Rev. Ent.* **37**, 113–140.
- Zarnack, W.** (1982). Untersuchungen zum Flug der Wanderheuschrecken. Die Bewegung, räumliche Lagebeziehung sowie Formen und Profile von Vorder- und Hinterflügeln. In *Insect Flight I. Biona-Report I* (ed. W. Nachtigall), pp. 79–102. Stuttgart, New York: Fischer.
